# Supplementary material for: On a seamlessly replicable circular photoreactor for lab-scale continuous flow applications
Source: Royal Society of Chemistry journal article supplement (doi:10.1039/d4re00109e), 2024-01-01
Supplement: d4re00109e1.xlsx [file d4re00109e1.xlsx]

## Sheet: Parts
Part	Link	Units	Cost/€	Cost/unit/€	Units needed	Cost/photoreactor/€
3D parts	See 3D printing sheet					34.99
Wire 18 AWG (0.75 mm²)	https://www.amazon.fr/dp/B09GKB582P/	1	23.99	23.99	0.1	2.399
Wire 14 AWG (2.0 mm²)	https://www.amazon.fr/dp/B089KLXD6C/	1	28.98	28.98	0.1	2.898
Heat shrink tubing	https://befr.rs-online.com/web/p/heat-shrink-tubing/8214718	1	108.97	108.97	0.1	10.897
Jumper wire cables	https://www.amazon.fr/dp/B074P726ZR/	1	8.99	8.99	0.1	0.899
Pin headers for PCB (male and female)	https://www.amazon.fr/dp/B07CC4V9ZY/	1	9.98	9.98	0.1	0.998
Hot-melt adhesive	https://www.amazon.fr/dp/B09BQSQM7V/	1	10.99	10.99	0.1	1.099
Spiral wrap tube for wire management	https://www.amazon.fr/dp/B07YFVV9R8/	1	9.88	9.88	1	9.88
Screws M2, M2.5, M3, nuts	https://www.amazon.fr/dp/B0BQ7GGZ9M/	1	11.99	11.99	0.1	1.199
Aluminium cooling block	https://www.amazon.fr/dp/B07NL2PDD6	1	17.86	17.86	2	35.72
Peltier module (Quick-Cool High-Tech)	https://www.amazon.fr/dp/B079R1T7BZ/	1	37.89	37.89	2	75.78
Fan 12 V, 40 x 40 x 20 mm	https://www.amazon.fr/dp/B07B65FT8F/	1	7.52	7.52	2	15.04
Heatsink	https://befr.rs-online.com/web/p/heatsinks/6744835	1	13.14	13.14	2	26.28
Thermal paste > 5 W/(m*K) 4g	https://www.amazon.fr/dp/B07L9BDY3T	1	4.73	4.73	1	4.73
Reflecting foil	https://www.amazon.fr/dp/B0C45XQ28X/	1	22.32	22.32	0.5	11.16
Glass or acrylic, 3 mm thickness	https://www.amazon.fr/dp/B01MT24R3Z/	1	12.99	12.99	0.3	3.897
Nylon screws M3x30 with nuts	https://www.amazon.fr/dp/B0B53HCHG1/	60	11.81	0.196833	4	0.787333
Arduino Nano Every with headers	https://befr.rs-online.com/web/p/arduino/1927590	1	14.89	14.89	1	14.89
BTS7960B – H-bridge motor driver 42A	https://www.amazon.fr/dp/B07Y4TTK3Z	1	13.19	13.19	1	13.19
LM2596 adjustable step-down converter	https://www.amazon.fr/dp/B08LVZL61S/	6	12.99	2.165	1	2.165
MeanWell HLG-320H-12A 12V 264W	https://www.amazon.fr/dp/B0154DI5LS/	1	110.39	110.39	1	110.39
Power plug	https://www.amazon.fr/dp/B00A7MC996/	1	5.5	5.5	1	5.5
XT60 connectors	https://www.amazon.fr/dp/B07N1N2C94/	10	8.99	0.899	1	0.899
OLED display 128x64 px I2C 0.96 inch	https://www.amazon.fr/dp/B074N9VLZX	3	16.99	5.66333	1	5.66333
DS18B20 temperature sensor	https://www.amazon.fr/dp/B075FYYLLV/	5	11.99	2.398	1	2.398
On/off rocker switch	https://www.amazon.fr/dp/B07WYRNNTY/	20	8.92	0.446	1	0.446
Push button 2 pins	https://www.amazon.fr/dp/B07XWYHPZH/	100	6.29	0.0629	2	0.1258
Resistor 4.7 kΩ (¼ W)	https://www.amazon.fr/dp/B07KS2FXCF	30	15.91	0.530333	1	0.530333
Terminal set 1 to 1 (wire connector)	https://www.amazon.fr/dp/B087325PTL/	26	9.99	0.384231	8	3.07385
Screw terminal block 2 pin	https://www.amazon.fr/dp/B07RR7D267/	100	10.65	0.1065	6	0.639
Screw terminal block 3 pin	https://www.amazon.fr/dp/B07RR7D267/	100	10.65	0.1065	1	0.1065
Jumper 2 pin (shunt)	https://www.amazon.fr/dp/B0B5LDXCX7/	200	9.99	0.04995	2	0.0999
Photoreactor custom PCB	Ordered from Aisler (2020)	3	20	6.66667	1	6.66667
Aluminium heatsink, fan and lens for LED chip	https://www.amazon.fr/dp/B01CW881TO/	1	27.99	27.99	3	83.97
LED COB (chip on board) 50W 375 nm	https://fr.aliexpress.com/item/1005004638776709.html	1	21.21	21.21	3	63.63
LED COB (chip on board) 50W 395 nm	https://fr.aliexpress.com/item/1005004638776709.html	1	14.96	14.96	3	44.88
LED COB (chip on board) 50W 425 nm	https://fr.aliexpress.com/item/1005004638776709.html	1	14.96	14.96	3	44.88
LED COB (chip on board) 50W 440 nm	https://www.amazon.fr/dp/B09DQ2ZTZH/	1	15.05	15.05	3	45.15
Power Supply Transformer AC 110V to DC 36V 10A	https://www.amazon.fr/dp/B075L68NHB	1	33.62	33.62	1	33.62
LM2596 adjustable step-down converter	https://www.amazon.fr/dp/B08LVZL61S/	6	12.99	2.165	1	2.165
LED dimmer DC (optional)	https://befr.rs-online.com/web/p/dimmer-switches/7693189	1	19.63	19.63	3	58.89
Terminal set 1 to 1 (wire connector)	https://www.amazon.fr/dp/B087325PTL/	26	9.99	0.384231	6	2.30538
Terminal set 2 to 6 (wire connector)	https://www.amazon.fr/dp/B08PCRXXJT/	7	10.99	1.57	1	1.57
C14 IEC panel mount connector male 10A 250V	https://befr.rs-online.com/web/p/iec-connectors/8117207	1	1.17	1.17	1	1.17
CEE 7/7 plug to IEC C13 socket	https://befr.rs-online.com/web/p/power-cords/2660615	1	8	8	1	8
On/off rocker switch	https://www.amazon.fr/dp/B07WYRNNTY/	20	8.92	0.446	1	0.446
Total			828.84			796.113
For most general supplies, only part of the items referenced will be used for one photoreactor, which was estimated at roughly 10%. Exact cost is variable and also dependent on item and local sourcing.
All links accessed 20/02/2024 unless otherwise specified

## Sheet: 3D printing
Part	Filament	Mass/unit/g	Cost/unit/€	Units needed	Mass/g	Cost/€
Photoreactor Frame	PETG	254.32	5.72	1	254.32	5.72
Photoreactor Foot	PETG	87.4	1.97	1	87.4	1.97
Photoreactor Reactor support	PETG	73.38	1.65	1	73.38	1.65
Photoreactor Lid Top	PETG	95.54	2.15	1	95.54	2.15
Photoreactor Lid Bottom	PETG	98.31	2.21	1	98.31	2.21
Photoreactor Clamp outisde	PETG	9.67	0.22	2	19.34	0.44
Photoreactor Clamp inside	PETG	10.69	0.24	4	42.76	0.96
LED Holder Frame	PETG	60.2	1.35	3	180.6	4.05
LED Holder Plate	PETG	71.38	1.61	3	214.14	4.83
LED Holder Foot	PETG	21.8	0.49	3	65.4	1.47
Control Unit Frame	PLA	109.76	2.2	1	109.76	2.2
Control Unit Back Panel	PLA	30.9	0.62	1	30.9	0.62
Control Unit Top	PLA	35.82	0.72	1	35.82	0.72
Control Unit Clamp	PLA	1.02	0.03	1	1.02	0.03
LED Power Supply Frame	PLA	202.29	4.19	1	202.29	4.19
LED Power Supply Back Panel	PLA	55.62	1.11	1	55.62	1.11
LED Power Supply Top n Clamp	PLA	33.3	0.67	1	33.3	0.67
Total PETG					1131.19	25.45
Total PLA					468.71	9.54
Total					1599.9	34.99
Cost of filament based on FormFutura prices for ReFill PETG and PLA, 20/02/2024
https://formfutura.com/product/refill-petg/
https://formfutura.com/product/refill-pla/
